# Supplementary material
Source: PubMed Central journal article supplement (PMC3670730)
Supplement: supp_mst008_Suppl_FigS1-S3_Sahi.pdf [file supp_mst008_Suppl_FigS1-S3_Sahi.pdf]

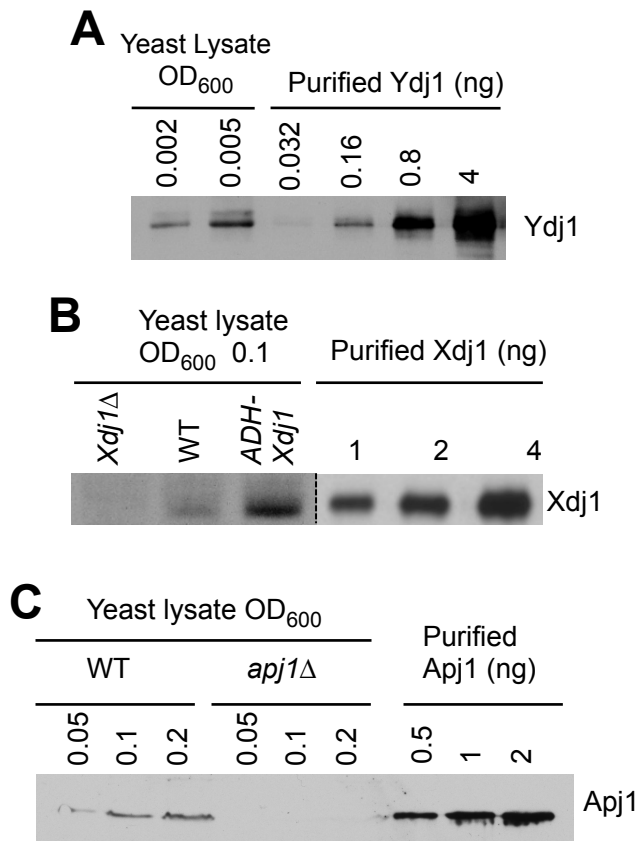

**Supplementary Figure S2. Ydj1 is approximately 100 times more abundant than Apj1 and Xdj1.** (A, B,C) Indicated amounts (OD<sub>600</sub>) of total protein isolated from wild-type, or the indicated mutant, yeast cells and purified Ydj1, Xdj1 or Apj1 (ng) were resolved by electrophoresis, electro-blotted and probed with antibody specific for one of the J-proteins, as indicated. Blots were scanned and densitometric quantification was performed using ImageJ software. (A) only wt lysates. (B) lysates from *xdj1*Δ, wild-type (WT) and *xdj1*Δ cells expressing pRS414-*ADH-Xdj1* (*ADH-Xdj1*). All samples were run on a single gel and blotted and processed together. Dashed line indicates where irrelevant lanes were spliced out. C) wild-type (WT) or *apj1*Δ yeast. Levels of protein in wt cells, estimated as described in Ghaemmaghami et al, 2003, were approximately 90,000, 500 and 100 molecules/cell of Ydj1, Xdj1 and Apj1, respectively. The estimates reported by Ghaemmaghami et al, 2003 using tagged protein in a high throughput analysis were 119,000, 1210 and 125 molecules/cell.

Ghaemmaghami S, Huh WK, Bower K, Howson RW, Belle A, Dephore N, O'Shea EK, Weissman JS (2003) Global analysis of protein expression in yeast. *Nature* **425**: 737-741.

### Supplementary Figure S3. List of Ascomycetes species surveyed in this work.

| <b>Species</b>                        | <b>4-letter code</b> | <b>Classification</b> |
|---------------------------------------|----------------------|-----------------------|
| <i>Schizosaccharomyces japonicus</i>  | Sjap                 | Taphrinomycotina      |
| <i>Schizosaccharomyces pombe</i>      | Spom                 | Taphrinomycotina      |
| <i>Schizosaccharomyces octosporus</i> | Soct                 | Taphrinomycotina      |
| <i>Schizosaccharomyces cryophilus</i> | Scry                 | Taphrinomycotina      |
| <i>Ajellomyces capsulatus</i>         | Acap                 | Pezizomycotina        |
| <i>Ucinocarpus reesii</i>             | Uree                 | Pezizomycotina        |
| <i>Coccidioides immitis</i>           | Cimm                 | Pezizomycotina        |
| <i>Aspergillus nidulans</i>           | Anid                 | Pezizomycotina        |
| <i>Aspergillus fumigatus</i>          | Afum                 | Pezizomycotina        |
| <i>Aspergillus oryzae</i>             | Aory                 | Pezizomycotina        |
| <i>Aspergillus terreus</i>            | Ater                 | Pezizomycotina        |
| <i>Phaeosphaeria nodorum</i>          | Pnod                 | Pezizomycotina        |
| <i>Magnaporthe grisea</i>             | Mgri                 | Pezizomycotina        |
| <i>Neurospora crassa</i>              | Ncra                 | Pezizomycotina        |
| <i>Podospora anserina</i>             | Pans                 | Pezizomycotina        |
| <i>Chaetomium globosum</i>            | Cglo                 | Pezizomycotina        |
| <i>Trichoderma reesei</i>             | Tree                 | Pezizomycotina        |
| <i>Gibberella moniliformis</i>        | Gmon                 | Pezizomycotina        |
| <i>Gibberella zeae</i>                | Gzea                 | Pezizomycotina        |
| <i>Botryotinia fuckeliana</i>         | Bfuc                 | Pezizomycotina        |
| <i>Sclerotinia sclerotiorum</i>       | Sscl                 | Pezizomycotina        |
| <i>Yarrowia lipolytica</i>            | Ylip                 | Yarrowia              |
| <i>Candida lusitanae</i>              | Clus                 | CTG group             |
| <i>Pichia guilliermondii</i>          | Pgui                 | CTG group             |
| <i>Debaryomyces hansenii</i>          | Dhan                 | CTG group             |
| <i>Candida parapsilosis</i>           | Cpar                 | CTG group             |
| <i>Candida tropicalis</i>             | Ctro                 | CTG group             |
| <i>Candida dubliniensis</i>           | Cdub                 | CTG group             |
| <i>Candida albicans</i>               | Calb                 | CTG group             |
| <i>Lachancea waltii</i>               | Lwal                 | pre-WGD               |
| <i>Lachancea kluyveri</i>             | Lklu                 | pre-WGD               |
| <i>Lachancea thermotolerans</i>       | Lthe                 | pre-WGD               |
| <i>Eremothecium gossypii</i>          | Egos                 | pre-WGD               |
| <i>Kluyveromyces lactis</i>           | Klac                 | pre-WGD               |
| <i>Zygosaccharomyces rouxii</i>       | Zrou                 | pre-WGD               |
| <i>Vandewaltozyma polyspora</i>       | Vpol                 | post-WGD              |
| <i>Saccharomyces castelli</i>         | Scas                 | post-WGD              |
| <i>Candida glabrata</i>               | Cgla                 | post-WGD              |
| <i>Saccharomyces bayanus</i>          | Sbay                 | post-WGD              |
| <i>Saccharomyces kudriavzevii</i>     | Skud                 | post-WGD              |
| <i>Saccharomyces mikatae</i>          | Smik                 | post-WGD              |
| <i>Saccharomyces cerevisiae</i>       | Scer                 | post-WGD              |
| <i>Saccharomyces paradoxus</i>        | Spar                 | post-WGD              |
