# Supplementary material
Source: PubMed Central journal article supplement (PMC3670730)
Supplement: supp_mst008_Suppl_FigS5-S7.pdf [file supp_mst008_Suppl_FigS5-S7.pdf]

| <b>ID</b> | <b>Sequence</b> | <b>frequency</b> |
|-----------|-----------------|------------------|
| X2        | FELRWMSEEPWV    | 8                |
| X4        | FSITLQSMHPWR    | 1                |
| X12       | VEIRFLTSYPWV    | 2                |
| X20       | LTIEAVSESPWR    | 1                |
| Y1        | GFIELIEWTALY    | 4                |
| Y2        | LSLEYISWGPYS    | 1                |
| Y3        | GRFSLVVRGILW    | 1                |
| Y4        | WQLNFSSPPLYN    | 1                |
| Y5        | STIYFSHPEASK    | 2                |
| Y6        | YTIHLSLPHRLG    | 1                |
| Y10       | WTIQFSSPGNLM    | 1                |
| Y11       | YVINFSPDHQLV    | 2                |
| Y15       | ATICFSSCGPQS    | 1                |
| Y16       | YTIHPSAGSDDP    | 1                |
| Y18       | QIIYLSSEVSL     | 1                |

**Supplementary Figure S5. Dodecapeptides presented on phage display isolates recovered in biopanning experiments with Xdj1 or Ydj1.** The letter prefix in each ID number (left column) indicates the protein target used (X for Xdj1, Y for Ydj1). The deduced amino acid sequence of the peptide displayed at the N-terminus of M13 coat protein III is displayed in the center column. Frequency refers to the number of independent isolates obtained for each specific sequence.

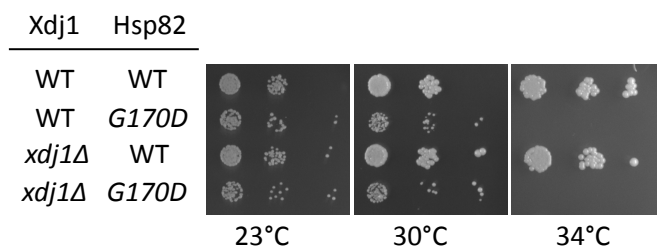

**Supplementary Figure S6. No obvious synthetic genetic interaction of *xdj1Δ* with Hsp90 mutant.** 5μl of ten fold serial dilution of *hsc82Δ hsp82Δ* or *xdj1Δ hsc82Δ hsp82Δ* cells expressing either pRS314-*GPD*-Hsp82 (WT) or the *ts* allele of Hsp90, pRS314-*GPD*-Hsp82<sub>G170D</sub> (*G170D*) were spotted on Trp omission plates and incubated at indicated temperatures for 3 days. Similar results (data not shown) were found using the strain background in which the original genomic wide screen was performed (Zhao R et al 2005).

Zhao R, Davey M, Hsu YC, Kaplanek P, Tong A, Parsons AB, Krogan N, Cagney G, Mai D, Greenblatt J, Boone C, Emili A, Houry WA (2005) Navigating the chaperone network: an integrative map of physical and genetic interactions mediated by the hsp90 chaperone. *Cell* **120**: 715-727

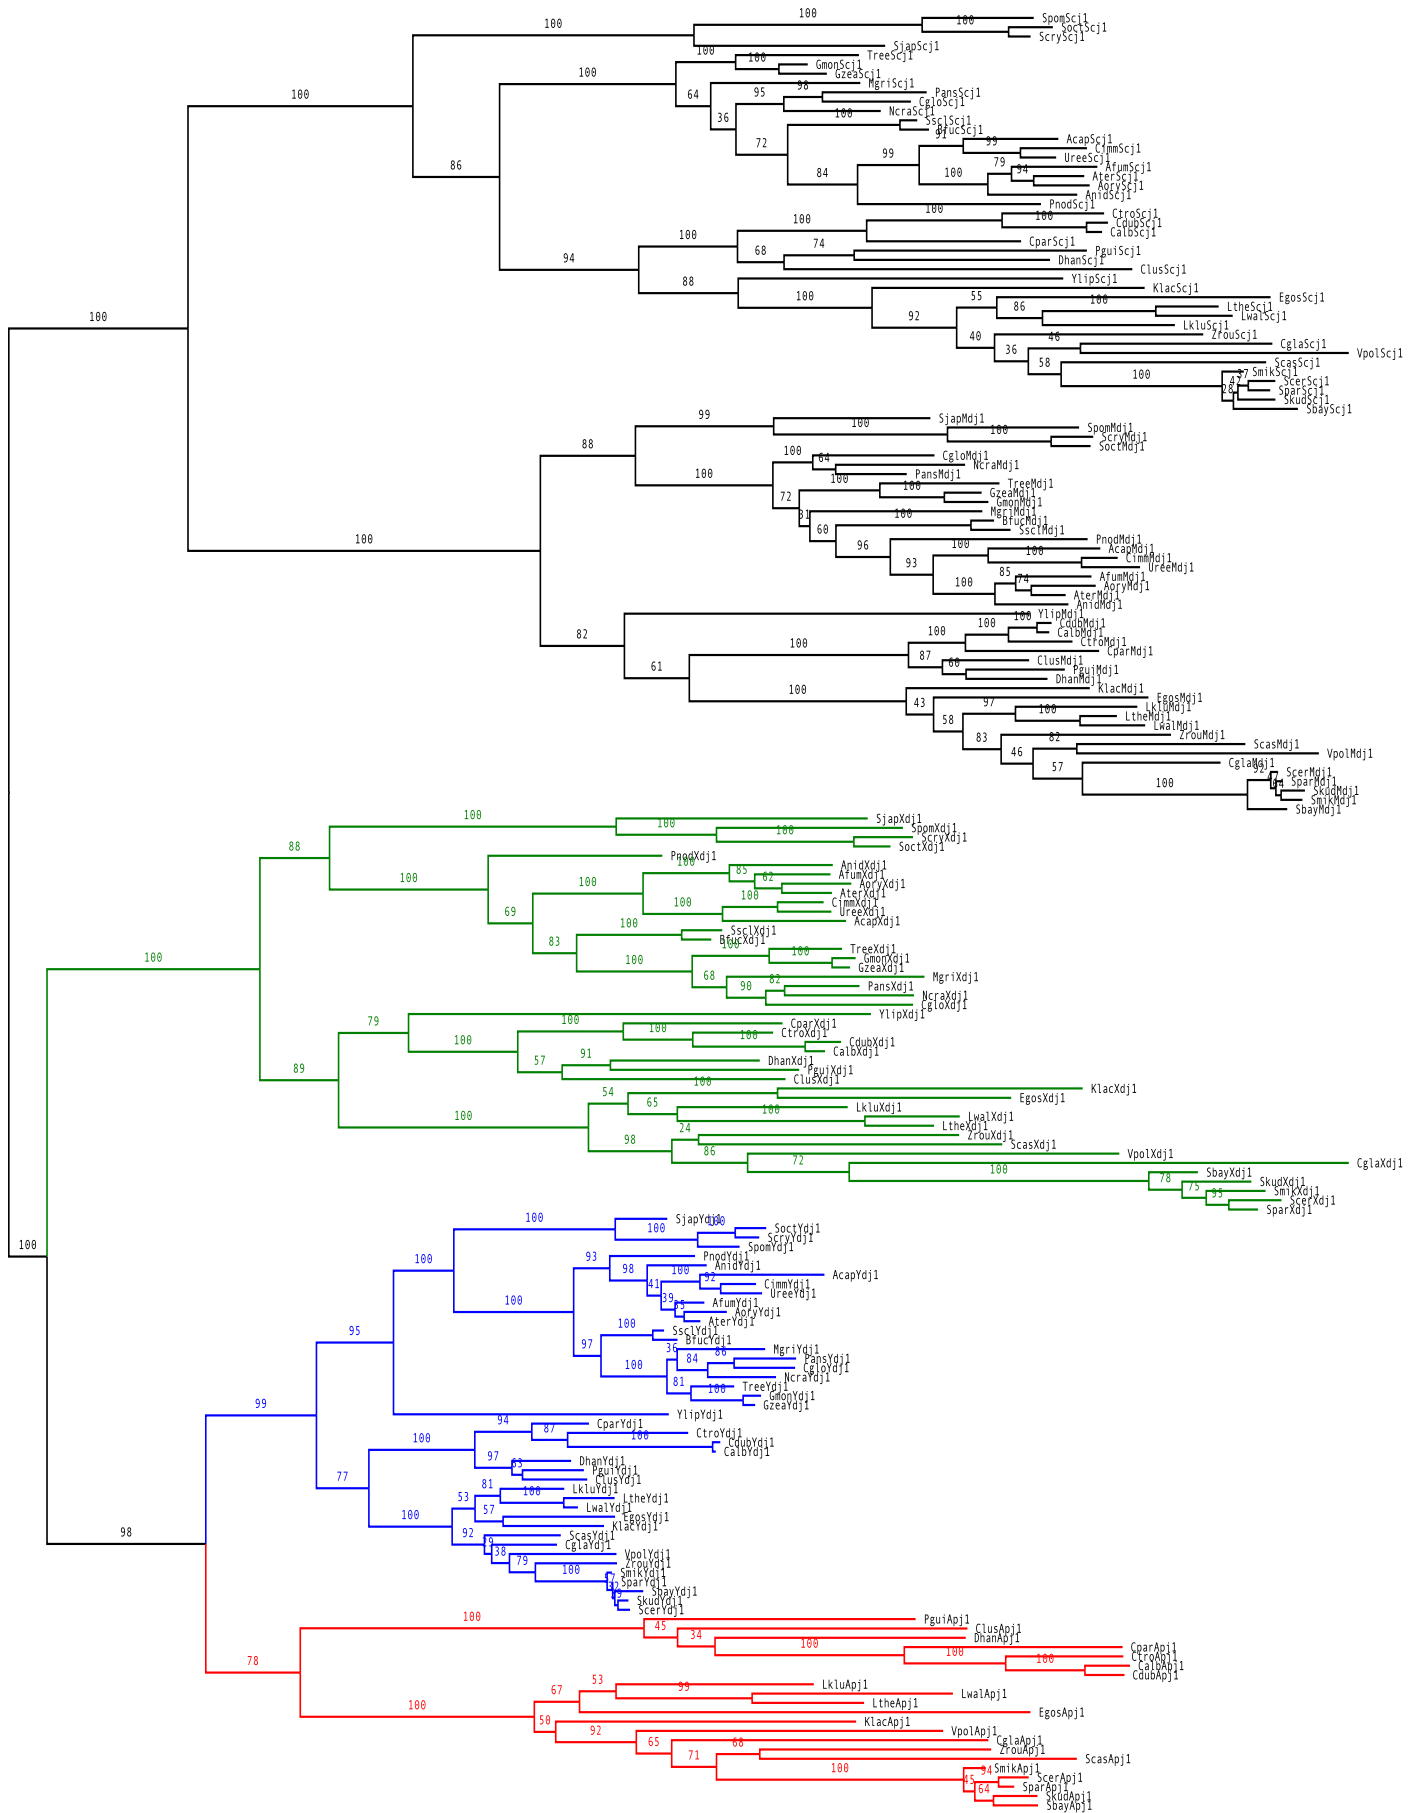

**Supplementary Figure S7. Fully resolved maximum-likelihood tree of the amino acid sequences of Ydj1, Xdj1, Apj1, Scj1 and Mdj1 used in the main text as Figure 6. All bootstrap values are shown above their respective branches. Species names and their codes are listed in Fig. S1.**
